# Supplementary material
Source: PubMed Central journal article supplement (PMC2856299)

## Supplementary Figure legends

**Supplementary Figure 1. Inclusion of cholesterol in the pipette solution induced an inhibition of M currents in SCG neurons.** A. Time course for the effect of M $\beta$ CD/Chol in the pipette on M currents. 150  $\mu$ M M $\beta$ CD/Chol was applied through pipette solution. M currents were monitored by 1 s hyperpolarizing steps to -60 mV from a holding potential of -20 mV at 5 s intervals as shown in the inset. Representative current traces are shown on the right. B. Summary of the percent inhibitions of M currents. Error bars indicate S.E.M. The numbers in parentheses indicate the number of cells tested. Note that inhibition of M currents by internal M $\beta$ CD/Chol (150  $\mu$ M) was not significantly different from that induced by external M $\beta$ CD/Chol (150  $\mu$ M).

**Supplementary Figure 2. The effect of M $\beta$ CD on M currents in SCG neurons.** A. Time course for the effect of 3 mM M $\beta$ CD on M currents. M $\beta$ CD was applied to the bath solution as indicated by the *horizontal bar* above the trace. M currents were monitored by 1 s hyperpolarizing steps to -60 mV from a holding potential of -20 mV at 5 s intervals as shown in the inset. Representative current traces are shown on the right. B. Time-dependent changes of M currents in the absence of M $\beta$ CD (●, n=3) and after application of 3 mM M $\beta$ CD to bath (○, n=4) or pipette (△, n=6). The perfusion of M $\beta$ CD to the bath started at the time indicated by the arrow. Data shown as means  $\pm$  S.E.M.

A

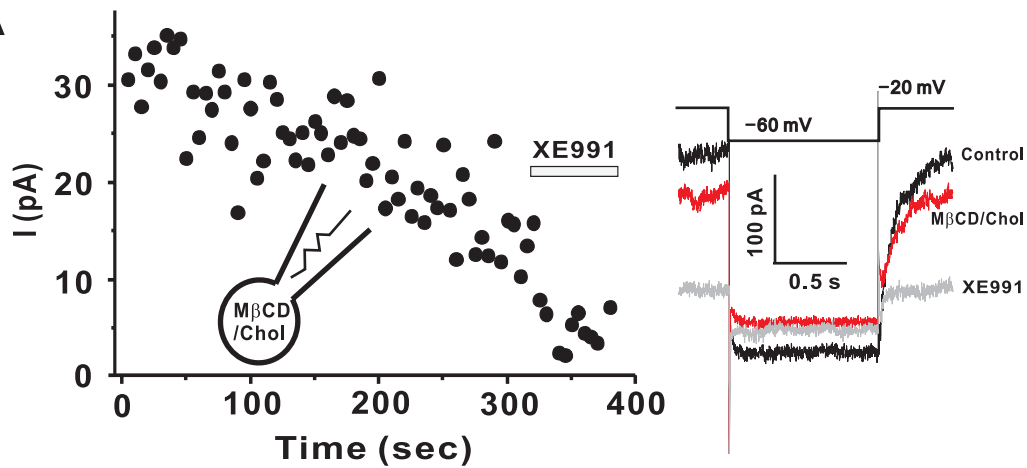

B

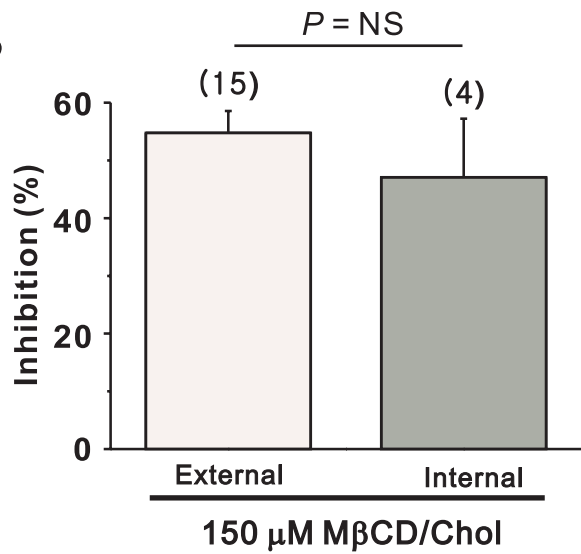

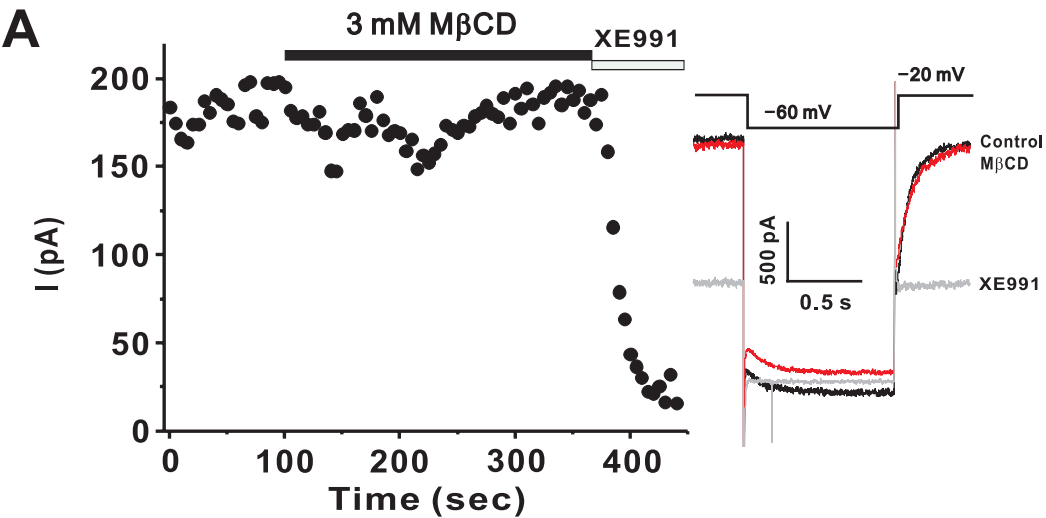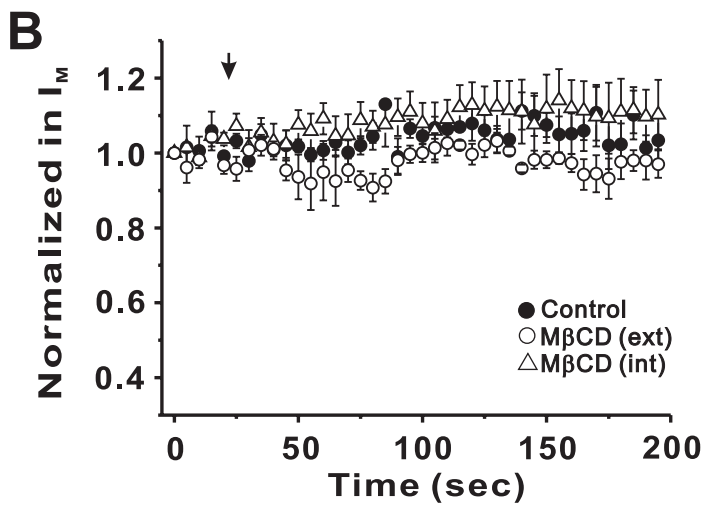

Supplement: supp_M109.048868_jbc.M109.048868-1.pdf [file supp_M109.048868_jbc.M109.048868-1.pdf]
